# Supplementary material for: The Association Between Overactive Bladder and Falls and Fractures: A Systematic Review
Source: Springer Nature journal article supplement (doi:10.1007/s12325-018-0796-8), 2018-09-25
Supplement: MOESM1 [file 16150556]

## Supplementary Material

**Supplementary Table 1:** PICOS criteria to guide the systematic review

|                                       |                                                                                                                                                                                                                                                                                |
|---------------------------------------|--------------------------------------------------------------------------------------------------------------------------------------------------------------------------------------------------------------------------------------------------------------------------------|
| <b>Population</b>                     | Community-dwelling adults; and among those, the subgroup with OAB or urgency incontinence.<br>Those with urinary incontinence, stress incontinence, nocturia, frequency, urgency incontinence, or OAB were included in a sensitivity analysis.                                 |
| <b>Interventions/<br/>Comparators</b> | Not applicable.                                                                                                                                                                                                                                                                |
| <b>Outcomes</b>                       | Estimates of the risk or rate of: <ul style="list-style-type: none"><li>• Falls</li><li>• Serious or recurrent falls</li><li>• Fractures</li></ul> Among those who have fallen or experienced a fracture, the unadjusted attributable risk of falls due to OAB or its symptoms |
| <b>Study Design</b>                   | <ul style="list-style-type: none"><li>• Prospective cohort studies / registries</li><li>• Retrospective cohort studies / database studies</li></ul>                                                                                                                            |

**Supplementary Table 2:** Medline/EMBASE search strategy (1985-2018)

|    | Search term                                                                                                                                           |
|----|-------------------------------------------------------------------------------------------------------------------------------------------------------|
| 1  | nocturia.mp,hw,tw. or Nocturia/                                                                                                                       |
| 2  | Overactive bladder.mp,hw,tw. or Urinary Bladder, Overactive/                                                                                          |
| 3  | urinary incontinence.mp,hw,tw. or Urinary Incontinence/                                                                                               |
| 4  | urge incontinence.mp,hw,tw. or Urinary Incontinence, Urge/                                                                                            |
| 5  | urinary urgency.mp,hw,tw.                                                                                                                             |
| 6  | (mirabegron or Myrbetriq).mp,hw,tw. or Adrenergic beta-3 Receptor Agonists/                                                                           |
| 7  | Muscarinic Antagonists/ or anti-muscarinics.mp,hw,tw.                                                                                                 |
| 8  | 1 or 2 or 3 or 4 or 5 or 6 or 7                                                                                                                       |
| 9  | Accidental Falls/                                                                                                                                     |
| 10 | fall\$.mp,hw.                                                                                                                                         |
| 11 | faller\$.mp,hw,tw.                                                                                                                                    |
| 12 | fallen.mp,hw,tw.                                                                                                                                      |
| 13 | falling.mp,hw,tw.                                                                                                                                     |
| 14 | injurious fall\$.mp,hw,tw.                                                                                                                            |
| 15 | fracture.mp,hw,tw.                                                                                                                                    |
| 16 | 9 or 10 or 11 or 12 or 13 or 14 or 15                                                                                                                 |
| 17 | cohort studies.mp. or Cohort Studies/                                                                                                                 |
| 18 | epidemiologic methods.mp. or Epidemiologic Methods/                                                                                                   |
| 19 | epidemiologic studies.mp. or Epidemiologic Studies/                                                                                                   |
| 20 | epidemiology.mp. or Epidemiology/                                                                                                                     |
| 21 | cohort analysis.mp. or Cohort Studies/                                                                                                                |
| 22 | Longitudinal Studies/ or longitudinal stud*.mp.                                                                                                       |
| 23 | Prospective Studies/ or prospective stud*.mp.                                                                                                         |
| 24 | Prospective Studies/ or prospective stud*.mp.                                                                                                         |
| 25 | Follow-Up Studies/ or follow-up stud*.mp.                                                                                                             |
| 26 | Retrospective Studies/ or retrospective stud*.mp.                                                                                                     |
| 27 | observational stud*.mp.                                                                                                                               |
| 28 | (observational adj3 (study or studies or design or analysis or analyses)).mp. [mp=ti, ab, hw, tn, ot, dm, mf, dv, kw, fx, dq, nm, kf, px, rx, ui, sy] |
| 29 | 17 or 18 or 19 or 20 or 21 or 22 or 23 or 24 or 25 or 26 or 27 or 28                                                                                  |
| 30 | 8 and 16 and 29                                                                                                                                       |
| 31 | limit 30 to animals                                                                                                                                   |
| 32 | 30 not 31                                                                                                                                             |
| 33 | limit 32 to yr=1985-2018                                                                                                                              |
| 34 | remove duplicates from 33                                                                                                                             |

**Supplementary Table 3: STROBE assessment**

| Citation                    | STROBE Item Number |   |   |   |   |   |   |   |   |    |    |    |    |    |    |    |    |    |    |    |    |    | Notes                                                                                               |
|-----------------------------|--------------------|---|---|---|---|---|---|---|---|----|----|----|----|----|----|----|----|----|----|----|----|----|-----------------------------------------------------------------------------------------------------|
|                             | 1                  | 2 | 3 | 4 | 5 | 6 | 7 | 8 | 9 | 10 | 11 | 12 | 13 | 14 | 15 | 16 | 17 | 18 | 19 | 20 | 21 | 22 |                                                                                                     |
| Brown, 2000                 | N                  | Y | Y | Y | Y | Y | Y | Y | Y | N  | N  | N  | Y  | Y  | Y  | Y  | Y  | Y  | Y  | Y  | Y  | Y  | Q1: Does not indicate study design in title                                                         |
| Darkow, 2005                | N                  | Y | Y | Y | Y | Y | Y | Y | Y | Y  | N  | N  | Y  | Y  | Y  | Y  | Y  | Y  | Y  | Y  | N  | N  | Q1: Does not indicate study design in title                                                         |
| Foley, 2012                 | N                  | Y | Y | Y | Y | Y | Y | Y | Y | N  | N  | N  | Y  | Y  | Y  | Y  | N  | Y  | Y  | Y  | Y  | N  | Q1: Does not indicate study design in title                                                         |
| Gomes, 2011                 | N                  | Y | Y | Y | Y | Y | Y | Y | Y | Y  | N  | N  | Y  | Y  | Y  | Y  | Y  | Y  | Y  | Y  | Y  | N  | Q1: Does not indicate study design in title                                                         |
| Jayadevappa, 2018           | N                  | Y | Y | Y | Y | Y | Y | Y | Y | Y  | N  | N  | Y  | Y  | Y  | Y  | Y  | Y  | Y  | Y  | Y  | N  | Q1: Does not indicate study design in title                                                         |
| Kao, 2018                   | Y                  | Y | Y | Y | Y | Y | Y | Y | Y | Y  | N  | Y  | Y  | Y  | Y  | Y  | N  | N  | Y  | N  | Y  | N  | Q15: Methods indicate that results were stratified by age, sex and index year but are not presented |
| Kurita, 2013                | N                  | Y | Y | Y | Y | Y | Y | Y | Y | N  | N  | N  | Y  | Y  | Y  | Y  | Y  | Y  | Y  | Y  | N  | Y  | Q1: Does not indicate study design in title                                                         |
| Luukinen, 1997              | N                  | Y | Y | Y | Y | Y | Y | Y | Y | N  | Y  | Y  | Y  | Y  | Y  | Y  | N  | Y  | Y  | Y  | Y  | Y  | Q1: Does not indicate study design in title                                                         |
| Luukinen, 1996              | N                  | Y | Y | Y | Y | Y | Y | Y | Y | N  | N  | Y  | Y  | Y  | Y  | Y  | Y  | Y  | N  | Y  | N  | Y  | Q1: Does not indicate study design in title                                                         |
| Moon, 2011                  | N                  | Y | Y | Y | Y | Y | Y | Y | Y | N  | N  | Y  | Y  | Y  | Y  | Y  | N  | Y  | Y  | Y  | Y  | Y  | Q1: Does not indicate study design in title                                                         |
| Noguchi, 2016               | N                  | Y | Y | Y | Y | Y | Y | Y | Y | N  | N  | Y  | Y  | Y  | Y  | Y  | N  | Y  | Y  | Y  | Y  | Y  | Q1: Does not indicate study design in title                                                         |
| Takazawa, 2005              | N                  | Y | Y | Y | Y | Y | Y | Y | Y | N  | N  | Y  | Y  | Y  | Y  | Y  | N  | Y  | Y  | Y  | Y  | N  | Q1: Does not indicate study design in title<br>Q4: No mention of study type                         |
| Teo, 2006                   | N                  | Y | Y | Y | Y | Y | Y | Y | Y | N  | N  | Y  | Y  | Y  | Y  | Y  | Y  | Y  | Y  | N  | Y  | Y  | Q1: Does not indicate study design in title                                                         |
| Wagner, 2002                | N                  | Y | Y | Y | Y | Y | Y | Y | Y | Y  | N  | N  | Y  | N  | Y  | Y  | Y  | Y  | Y  | Y  | N  | N  | Q1: Does not indicate study design in title                                                         |
| Yehoshua, 2016              | N                  | Y | Y | Y | Y | Y | Y | Y | Y | N  | N  | Y  | Y  | Y  | Y  | Y  | N  | Y  | Y  | Y  | N  | Y  | Q1: Does not indicate study design in title                                                         |
| <b>Sensitivity analysis</b> |                    |   |   |   |   |   |   |   |   |    |    |    |    |    |    |    |    |    |    |    |    |    |                                                                                                     |
| Asplund, 2006               | N                  | Y | Y | Y | Y | Y | Y | Y | Y | N  | N  | Y  | Y  | N  | N  | Y  | Y  | N  | Y  | N  | Y  | N  | Q1: Does not indicate study design in title or abstract<br>Q4: No mention of study type             |
| Cesari, 2002                | N                  | Y | Y | Y | Y | Y | Y | Y | Y | N  | N  | Y  | Y  | N  | Y  | Y  | Y  | Y  | Y  | Y  | Y  | N  | Q1: Does not indicate study design in title or abstract                                             |
| de Rekeniere, 2003          | N                  | Y | Y | Y | Y | Y | Y | Y | Y | N  | N  | Y  | Y  | Y  | Y  | Y  | Y  | Y  | Y  | Y  | N  | Y  | Q1: Does not indicate study design in title                                                         |
| Endeshaw, 2009              | N                  | Y | Y | Y | Y | Y | Y | Y | Y | N  | N  | Y  | Y  | Y  | Y  | Y  | 3  | Y  | Y  | Y  | Y  | Y  | Q1: Does not indicate study design in title<br>Q4: No mention of study type                         |
| Galizia, 2012               | N                  | Y | Y | Y | Y | Y | Y | Y | Y | N  | N  | Y  | Y  | Y  | Y  | Y  | N  | Y  | N  | Y  | N  | N  | Q1: Does not indicate study design in title                                                         |

|                  |   |   |   |   |   |   |   |   |   |   |   |   |   |   |   |   |   |   |   |   |   |   |                                                                             |                                             |
|------------------|---|---|---|---|---|---|---|---|---|---|---|---|---|---|---|---|---|---|---|---|---|---|-----------------------------------------------------------------------------|---------------------------------------------|
| Hedman, 2013     | N | Y | Y | Y | Y | Y | Y | Y | Y | Y | Y | N | Y | Y | Y | Y | Y | N | Y | Y | Y | Y | Y                                                                           | Q1: Does not indicate study design in title |
| Huang, 2004      | N | Y | Y | Y | Y | Y | Y | Y | Y | Y | Y | Y | Y | Y | N | Y | N | Y | Y | Y | N | N | Q1: Does not indicate study design in title                                 |                                             |
| Johansson, 1996a | N | Y | Y | Y | Y | Y | Y | Y | Y | N | N | Y | Y | Y | Y | Y | Y | Y | N | Y | N | Y | Q1: Does not indicate study design in title<br>Q4: No mention of study type |                                             |
| Johansson, 1996b | N | Y | Y | Y | Y | Y | Y | Y | N | N | N | Y | Y | Y | Y | Y | Y | Y | N | Y | N | Y | Q1: Does not indicate study design in title<br>Q4: No mention of study type |                                             |
| Marshall, 2016   | N | Y | Y | Y | Y | Y | Y | Y | Y | N | Y | Y | N | Y | Y | N | Y | Y | Y | Y | Y | Y | Q1: Does not indicate study design in title                                 |                                             |
| Nakagawa, 2010   | Y | Y | Y | Y | Y | Y | Y | Y | N | N | N | Y | Y | Y | Y | Y | Y | Y | N | Y | N | Y | Q2: No mention of hypothesis                                                |                                             |
| Nevitt, 1989     | Y | Y | Y | Y | Y | Y | Y | Y | N | N | Y | Y | Y | Y | Y | Y | Y | Y | Y | Y | N | N | Q4: No mention of study type                                                |                                             |
| Parsons, 2009    | N | Y | Y | Y | Y | Y | Y | Y | N | N | Y | Y | Y | Y | Y | Y | Y | Y | Y | Y | N | Y | Q1: Does not indicate study design in title                                 |                                             |
| Schluter, 2017   | N | Y | Y | Y | Y | Y | Y | Y | N | Y | Y | Y | Y | Y | Y | Y | Y | Y | Y | Y | N | N | Q1: Does not indicate study design in title                                 |                                             |
| Sohn, 2018       | N | Y | Y | Y | Y | N | Y | Y | N | Y | Y | Y | Y | Y | Y | Y | Y | Y | Y | Y | N | N | Q1: Does not indicate study design in title                                 |                                             |
| Stenhagen, 2013  | Y | Y | Y | Y | Y | Y | Y | Y | N | N | Y | Y | Y | Y | Y | Y | Y | Y | Y | Y | Y | N | N                                                                           |                                             |
| Temml, 2009      | N | Y | Y | Y | Y | Y | Y | Y | N | N | Y | Y | Y | Y | Y | Y | N | Y | Y | Y | N | N | Q1: Does not indicate study design in title<br>or abstract                  |                                             |
| Tinetti, 1988    | N | Y | Y | Y | Y | Y | Y | Y | Y | N | Y | Y | Y | Y | Y | Y | Y | Y | Y | Y | N | Y | Q1: Does not indicate study design in title                                 |                                             |
| Tromp, 1998      | N | Y | Y | Y | Y | Y | Y | Y | N | N | Y | Y | Y | Y | Y | Y | Y | Y | Y | Y | Y | Y | Q1: Does not indicate study design in title                                 |                                             |
| Tromp, 2001      | Y | Y | Y | Y | Y | Y | Y | Y | N | N | Y | Y | Y | Y | Y | Y | Y | Y | Y | Y | Y | Y |                                                                             |                                             |
| Val Helder, 2007 | N | Y | Y | Y | Y | Y | Y | Y | N | N | N | Y | Y | Y | Y | Y | Y | Y | Y | Y | N | Y | Q1: Does not indicate study design in title<br>or abstract                  |                                             |
| Vaughan, 2010    | Y | Y | Y | Y | Y | Y | Y | Y | N | N | Y | Y | Y | Y | Y | Y | Y | Y | Y | Y | N | Y |                                                                             |                                             |
| Wu, 2012         | N | Y | Y | Y | Y | Y | Y | Y | N | N | N | N | N | Y | N | Y | N | Y | N | Y | N | N | Q1: Does not indicate study design in title<br>or abstract                  |                                             |

**Supplementary Table 4:** Characteristics of included studies of falls and fractures among those diagnosed with OAB (core analyses)

| Citation           | N       | Study design (setting)                                                                                | OAB measure                                              | Falls or fracture measure                           | Follow up period |
|--------------------|---------|-------------------------------------------------------------------------------------------------------|----------------------------------------------------------|-----------------------------------------------------|------------------|
| Brown, 2000        | 6,049   | Prospective cohort (US) of community-dwelling women from the Study of Osteoporotic Fractures          | Urge incontinence by self-report over the past 12 months | Falls or fractures by self-report                   | Mean 3 years     |
| Darkow, 2005       | 23,132  | Retrospective cohort (US) from a managed care database                                                | OAB by ICD codes                                         | Falls by ICD codes                                  | 1 year           |
| Foley, 2012        | 5,162   | Cross-sectional study of community-dwelling adults (UK)                                               | Urge incontinence by self-report                         | Falls by self-report                                | 1 year           |
| Gomes, 2011        | 81,126  | Retrospective population-based cohort (Canada)                                                        | OAB by medication dispensation records                   | Serious fall or fracture, by emergency room records | 3 months         |
| Jayadevappa, 2018* | 284,625 | Retrospective cohort (US) of Medicare registrants                                                     | OAB by ICD codes                                         | Falls by ICD codes                                  | 3 years          |
| Kao, 2018          | 14,635  | Retrospective cohort (Taiwan) from the Taiwan Longitudinal Health Insurance Database                  | OAB by ICD codes                                         | Fractures by ICD codes                              | 3 years          |
| Kurita, 2013       | 941     | Cross-sectional community-dwelling population (Japan)                                                 | OAB by self-report                                       | Falls by self-report                                | 1 month          |
| Luukinen, 1996     | 1,016   | Population-based case-control study (Finland)                                                         | Urge incontinence by self-report                         | Recurrent falls by self-report                      | 1 year           |
| Luukinen, 1997**   | 792     | Nested population-based case-control study (Finland)                                                  | Urge incontinence by self-report                         | Fractures by self-report                            | N/A              |
| Moon, 2011         | 514     | Cross-sectional community-dwelling national sample (Korea)                                            | OAB by self-report                                       | Falls by self-report                                | 1 year           |
| Noguchi, 2016      | 1,390   | Prospective cohort of community-dwelling men in metropolitan Sydney                                   | OAB by self-report                                       | Falls by self-report                                | 1 year           |
| Takazawa, 2005     | 118     | Prospective cohort of community-dwelling adults (Japan)                                               | Urge incontinence by self-report                         | Falls (one or more; recurrent) by self-report       | 1 year           |
| Teo, 2006          | 782     | Cross-sectional survey of community-dwelling adults (Australia)                                       | Urge incontinence by self-report                         | Falls by self-report                                | 1 year           |
| Yehoshua, 2016     | 620     | Retrospective cohort of patients within a network of medical groups and physicians serving greater LA | OAB by ICD codes                                         | Falls and fractures by ICD codes                    | At least 1 year  |

| Citation     | N   | Study design (setting)                 | OAB measure        | Falls or fracture measure           | Follow up period |
|--------------|-----|----------------------------------------|--------------------|-------------------------------------|------------------|
| Wagner, 2002 | 919 | Cross-sectional sample from NOBLE (US) | OAB by self-report | Falls, serious falls by self-report | 1 year           |

\*Follow up period included one year prior to OAB diagnosis and two years following OAB diagnosis. Sample size reflects OAB

\*\*Study participants identified at time of fracture

ICD: International Classification of Diseases; OAB: Overactive bladder; US: United States

**Supplementary Table 5:** Characteristics of additional studies of falls and fractures among those with OAB symptoms (sensitivity analyses)

| Citation                                            | Country     | Population setting                                                                | Study design       | OAB factor        | OAB measure       | Falls or fracture outcome         | Outcome measure                                | Follow up period                        |
|-----------------------------------------------------|-------------|-----------------------------------------------------------------------------------|--------------------|-------------------|-------------------|-----------------------------------|------------------------------------------------|-----------------------------------------|
| <i>Prospective ascertainment of falls/fractures</i> |             |                                                                                   |                    |                   |                   |                                   |                                                |                                         |
| Marshall, 2016                                      | US          | Community-dwelling older men                                                      | Prospective cohort | LUTS              | AUA Symptom Index | Fractures                         | Self-report                                    | 11 years                                |
| Nakagawa, 2010                                      | Japan       | Population-based study of community-dwelling older adults                         | Prospective cohort | Nocturia          | Self-report       | Fractures                         | Claims for admission/death due to fracture     | 5 years                                 |
| Nevitt, 1989                                        | US          | Community-dwelling persons from San Francisco                                     | Prospective cohort | UI                | Self-report       | Recurrent falls                   | Self-report                                    | 1 year                                  |
| Parsons, 2009                                       | US          | Community-dwelling men aged $\geq 65$ years (Osteoporotic Fractures in Men study) | Prospective cohort | LUTS              | AUA Symptom Index | Falls                             | Self-report                                    | 1 year                                  |
| Schluter, 2017                                      | New Zealand | Community care recipients $\geq 65$ years                                         | Prospective cohort | UI                | Self-report       | Falls and fractures               | ICD-10 codes (fracture)<br>Self-report (falls) | 39 months (fracture)<br>90 days (falls) |
| Stenhagen, 2013                                     | Sweden      | Community-dwelling adults from the 'Good Aging in Skane' study                    | Prospective cohort | UI                | Self-report       | Falls                             | Self-report                                    | 3 and 6 years                           |
| Temml, 2009                                         | Austria     | Community-dwelling males aged 40+ in Vienna                                       | Prospective cohort | LUTS and nocturia | Self-report       | Fractures                         | Admission to the ED                            | Mean, 6.2 years                         |
| Tinetti, 1988                                       | US          | Community-dwelling older adults in the Yale Healthy Aging Project                 | Prospective cohort | UI                | Self-report       | Falls                             | Self-report                                    | 1 year                                  |
| Tromp, 1998                                         | Netherlands | Community-dwelling adults in the Longitudinal Study of Aging, Amsterdam           | Prospective cohort | UI                | Self-report       | Falls, recurrent falls, fractures | Self-report                                    | Falls: 1 year<br>Fractures: 38 months   |
| Tromp, 2001                                         | Netherlands | Community-dwelling adults in the Longitudinal Study of Aging, Amsterdam           | Prospective cohort | UI                | Self-report       | Falls                             | Self-report                                    | 1 year                                  |

| Citation                                                     | Country     | Population setting                                                      | Study design         | OAB factor | OAB measure                     | Falls or fracture outcome | Outcome measure                 | Follow up period |
|--------------------------------------------------------------|-------------|-------------------------------------------------------------------------|----------------------|------------|---------------------------------|---------------------------|---------------------------------|------------------|
| Val Helder, 2007                                             | Netherlands | Attendees at a hospital fracture clinic                                 | Prospective cohort   | UI         | Self-report                     | Falls                     | Self-report                     | 1 year           |
| Vaughan, 2010                                                | US          | Random Medicare sample from the Birmingham Study of Aging               | Prospective cohort   | Nocturia   | Self-report                     | Falls                     | Self-report                     | 3 years          |
| Wu, 2012                                                     | Taiwan      | Female registrants in the Taiwanese National Health Insurance program   | Retrospective cohort | LUTS       | ICD codes                       | Fractures                 | Admission to orthopedics wards  | 3 years          |
| <b><i>Retrospective ascertainment of falls/fractures</i></b> |             |                                                                         |                      |            |                                 |                           |                                 |                  |
| Asplund, 2006                                                | Sweden      | Population-based community-dwelling adults                              | Cross-sectional      | Nocturia   | Self-report                     | Hip fractures             | Self-report                     | 5 years          |
| Cesari, 2002                                                 | Italy       | Population-based study of Italian adults admitted to home care programs | Retrospective cohort | UI         | Health care provider assessment | Falls                     | Health care provider assessment | 90 days          |
| de Rekeniere, 2003                                           | US          | Community-dwelling older adults in the Health ABC study                 | Retrospective cohort | UI         | Self-report                     | Falls                     | Self-report                     | 1 year           |
| Endeshaw, 2009                                               | US          | Community-dwelling older adults                                         | Cross-sectional      | Nocturia   | Self-report                     | Falls                     | Self-report                     | 6 months         |
| Galizia, 2012                                                | Italy       | Community-dwelling older adults                                         | Cross-sectional      | Nocturia   | Self-report                     | Falls                     | Self-report                     | 1 year           |
| Hedman, 2013                                                 | Sweden      | Community-dwelling older (>75 years) adults in Sweden                   | Cross-sectional      | UI         | Self-report                     | Falls                     | Self-report                     | 1 year           |
| Huang, 2004                                                  | Taiwan      | Residents within sheltered housing projects in Taiwan                   | Cross-sectional      | UI         | Self-report                     | Falls                     | Self-report                     | 1 year           |
| Johansson, 1996a*                                            | Sweden      | Population-based study of older (>70 years) women in Goteborg, Sweden   | Cross-sectional      | UI         | Self-report                     | Hip fractures             | Health care provider assessment | N/A              |
| Johansson, 1996b                                             | Sweden      | Population-based study of women (>46 years) in Goteborg, Sweden         | Cross-sectional      | UI         | Self-report                     | Fractures                 | Self-report                     | N/A              |
| Lee, 2009                                                    | US          | Community-dwelling older adults in the Health and                       | Cross-sectional      | UI         | Self-report                     | Falls                     | Self-report                     | 2 years          |



| Citation         | Country | Population setting                                                            | Study design         | OAB factor | OAB measure  | Falls or fracture outcome | Outcome measure | Follow up period                    |
|------------------|---------|-------------------------------------------------------------------------------|----------------------|------------|--------------|---------------------------|-----------------|-------------------------------------|
| Retirement Study |         |                                                                               |                      |            |              |                           |                 |                                     |
| Moreira, 2007    | Brazil  | Community-based older adults attending outpatient clinics                     | Cross-sectional      | UI         | Nurse report | Falls                     | Self-report     | 1 year                              |
| Rosso, 2013      | US      | Community-dwelling women in the Women's Health Initiative observational study | Cross-sectional      | UI         | Self-report  | Falls                     | Self-report     | 1 year                              |
| Sohn, 2018       | Korea   | Community-dwelling women $\geq 65$ years                                      | Retrospective cohort | UI         | Self-report  | Falls                     | Self-report     | 2 years                             |
| Stewart, 1992    | US      | Community-dwelling older adults in a geriatrics program in Florida            | Cross-sectional      | Nocturia   | Self-report  | Falls or fractures        | Self-report     | Falls: 1 year<br>Fractures: 5 years |
| Yasumura, 1994   | Japan   | Community-dwelling older adults in Japan                                      | Cross-sectional      | Nocturia   | Self-report  | Falls                     | Self-report     | 1 year                              |

\*Characteristics of additional studies not included in core analysis only

ED: Emergency department; ICD: International Classification of Diseases; LUTS: Lower urinary tract symptoms; OAB: Overactive bladder; UI: Urinary incontinence; US: United States

**Supplementary Fig.1** Unadjusted estimates of the risk of A) prospectively-ascertained falls; B) retrospectively-ascertained falls; among those with OAB symptoms, according to mean age and the percentage male of the sample (sensitivity analyses)

(a)

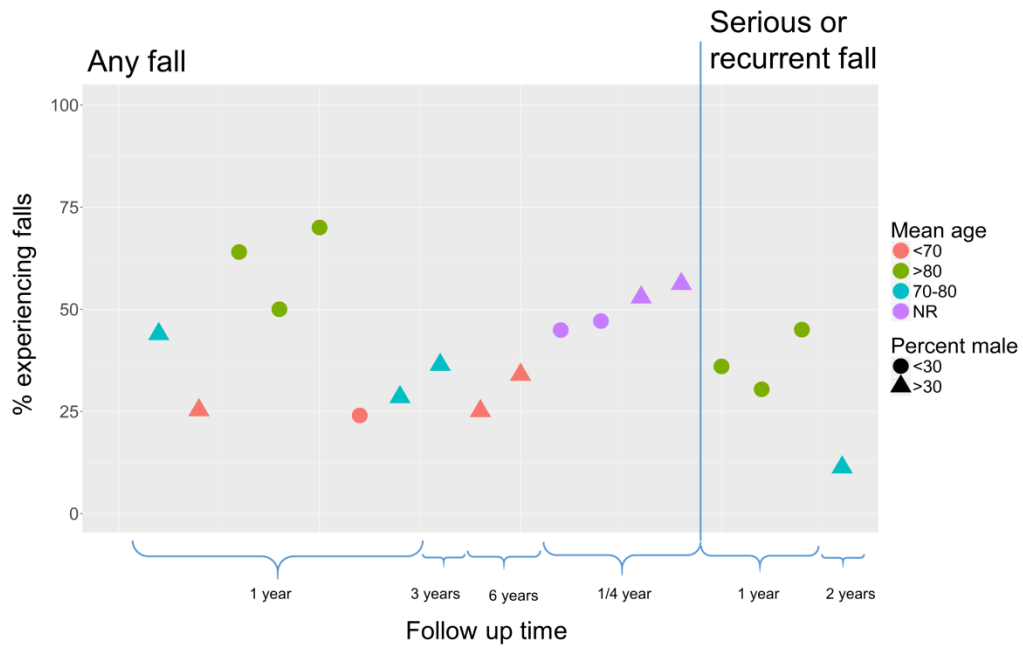

(b)

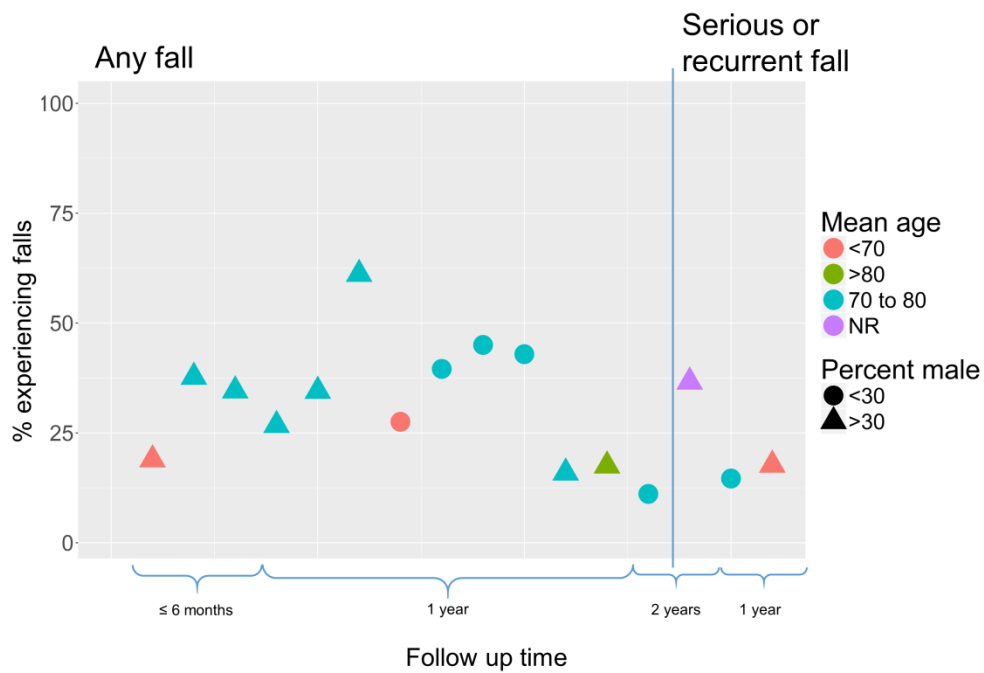

**Supplementary Fig. 2** Adjusted estimates of the risk of A) falls or B) fractures, among those with OAB symptoms (sensitivity analyses)

(a)

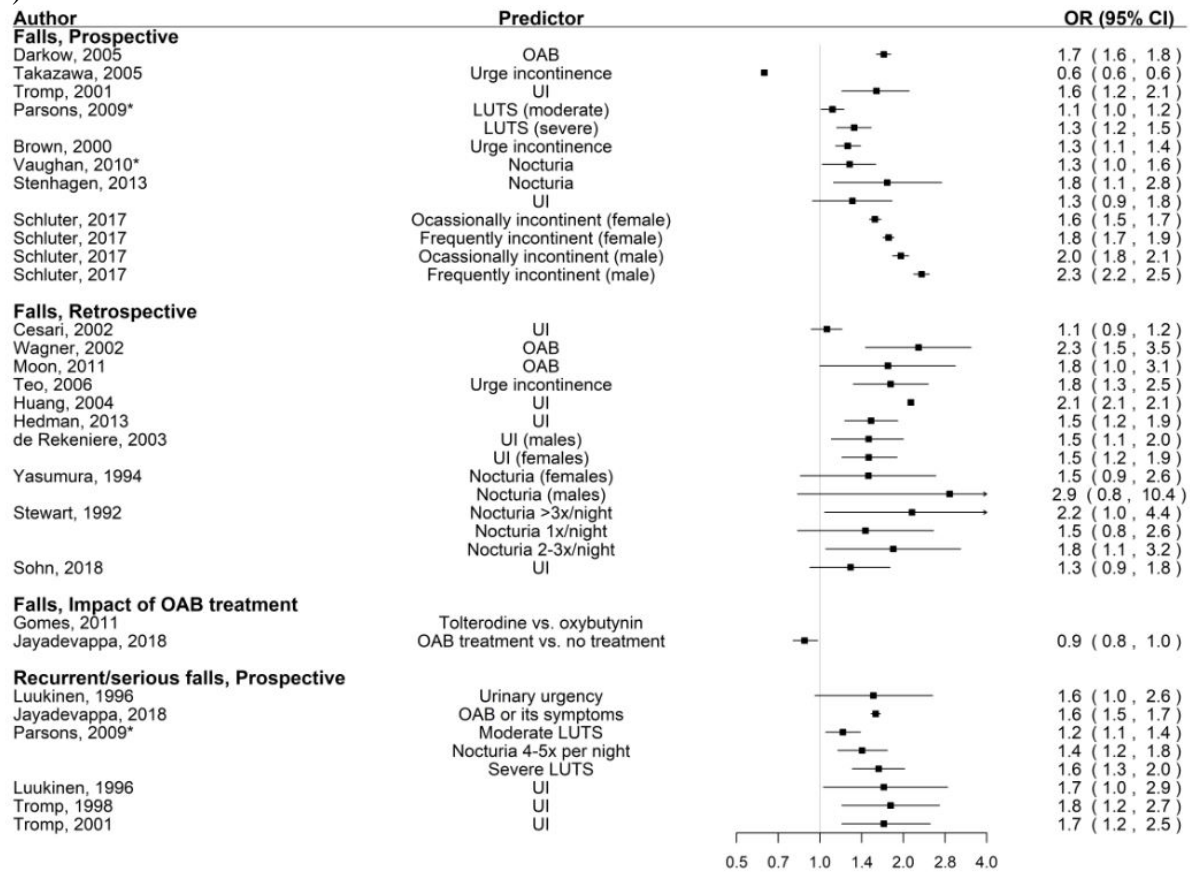

\*Presented hazard ratios rather than odds ratios

(b)

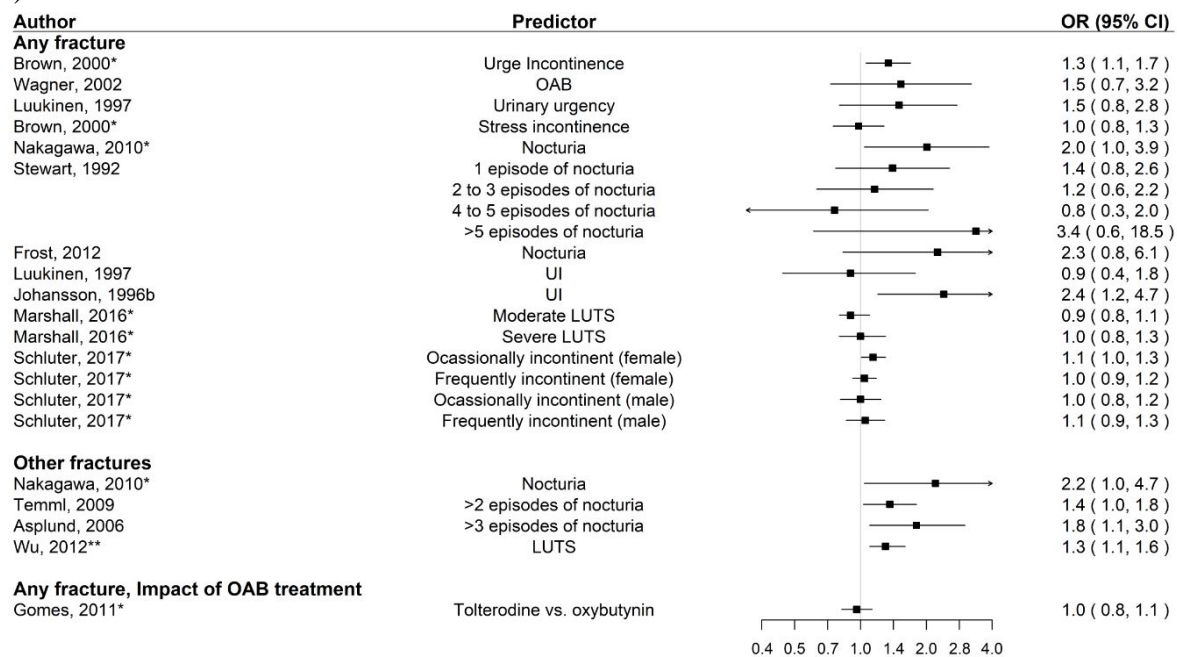

\*Presented hazard ratios rather than odds ratios

\*\*Presented incidence rate ratios rather than odds ratios
